# Supplementary material for: Slow Noise in the Period of a Biological Oscillator Underlies Gradual Trends and Abrupt Transitions in Phasic Relationships in Hybrid Neural Networks
Source: PubMed Central journal article supplement (PMC4022488; doi:10.1371/journal.pcbi.1003622), 2014-05-15

**A. Hybrid Circuit Experiment # 19**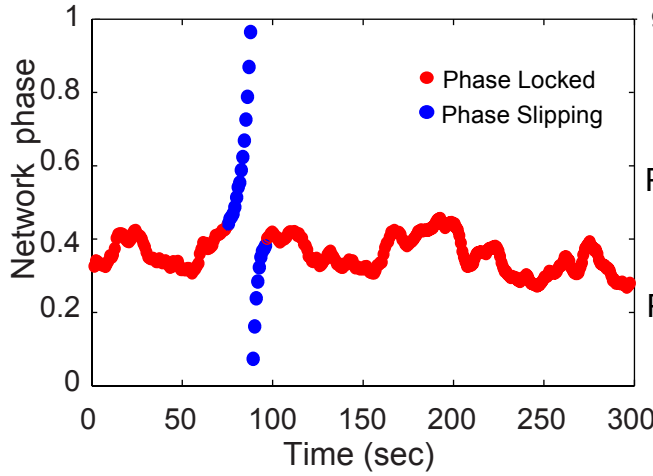**B. Gaussian noise added to period**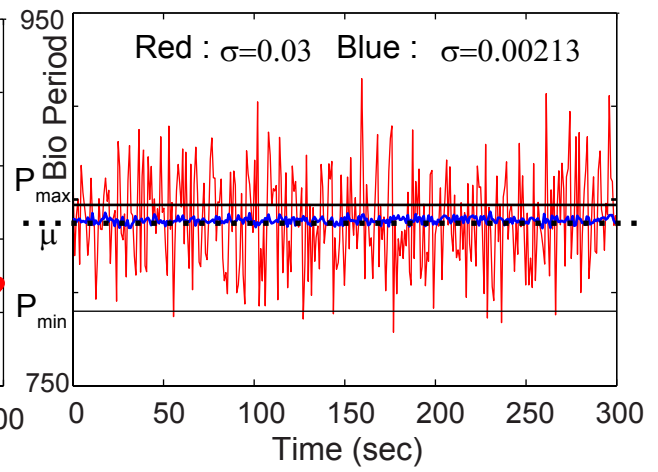**C1. Network simulation (low noise)**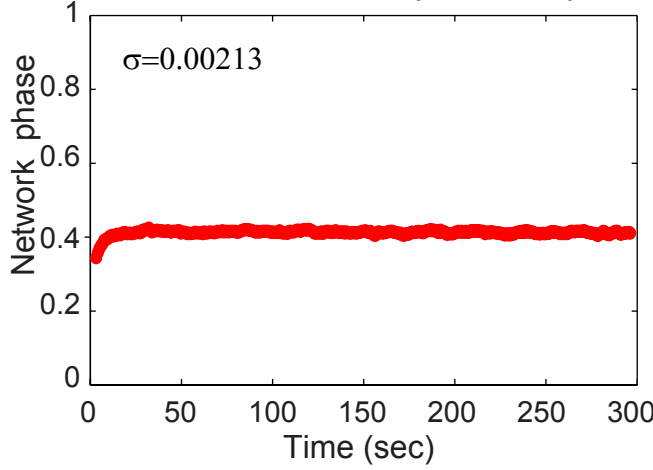**C2. Network simulation (high noise)**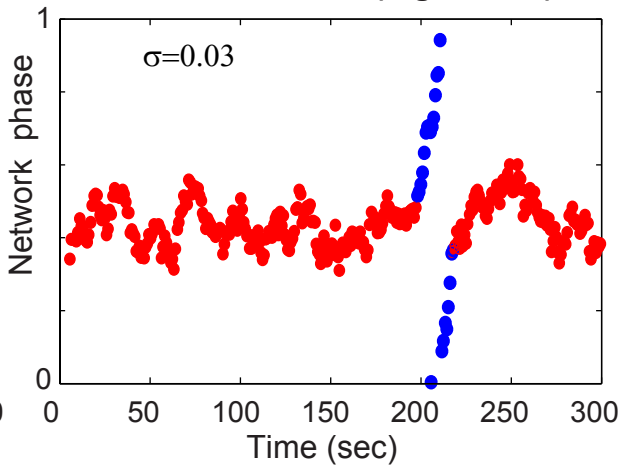**D1. PRC (low noise)**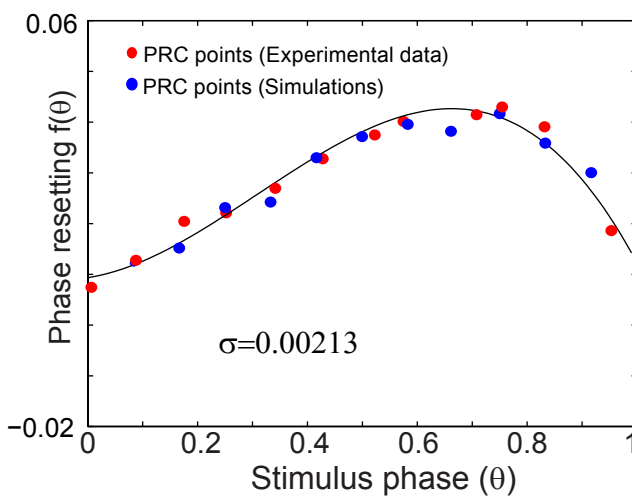**D2. PRC (high noise)**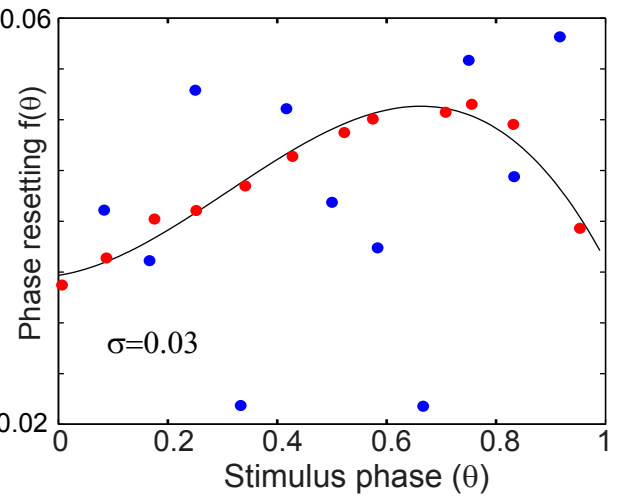

Supplement: pcbi.1003622.s001.pdf [file pcbi.1003622.s001.pdf]
