# Supplementary material for: Slow Noise in the Period of a Biological Oscillator Underlies Gradual Trends and Abrupt Transitions in Phasic Relationships in Hybrid Neural Networks
Source: PubMed Central journal article supplement (PMC4022488; doi:10.1371/journal.pcbi.1003622), 2014-05-15
Supplement: pcbi.1003622.s002.pdf [file pcbi.1003622.s002.pdf]

**A. Expt. 25 ( $\mu = 830.8$ )**

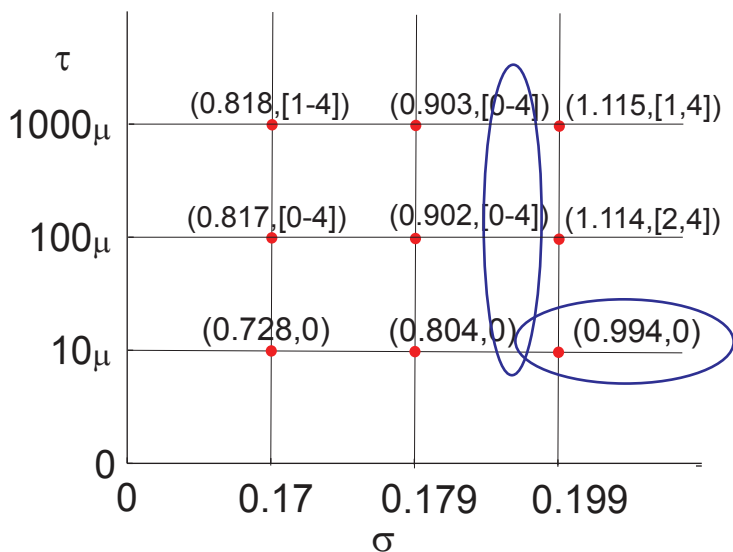

**C. Expt. 28 ( $\mu = 875.1$ )**

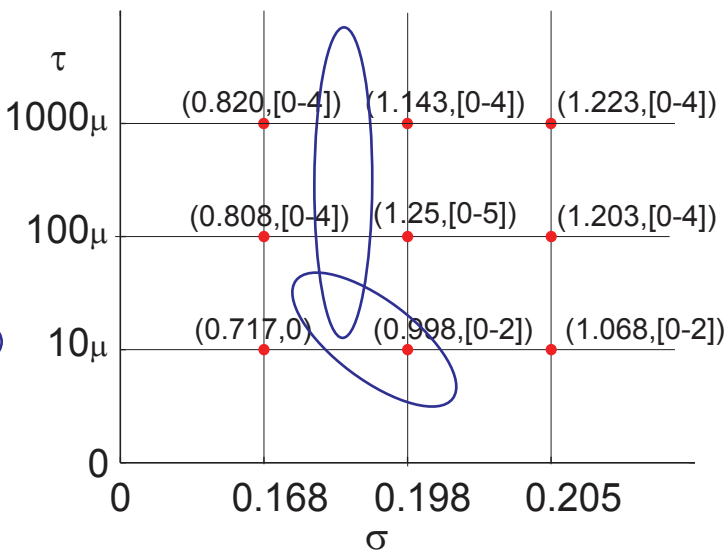

**B. Expt. 27 ( $\mu = 272.4$ )**

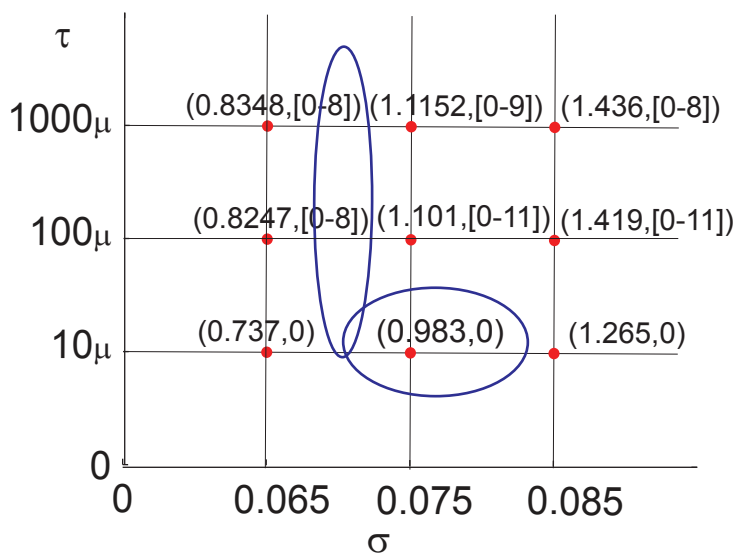

**D. Expt. 34 ( $\mu = 806.3$ )**

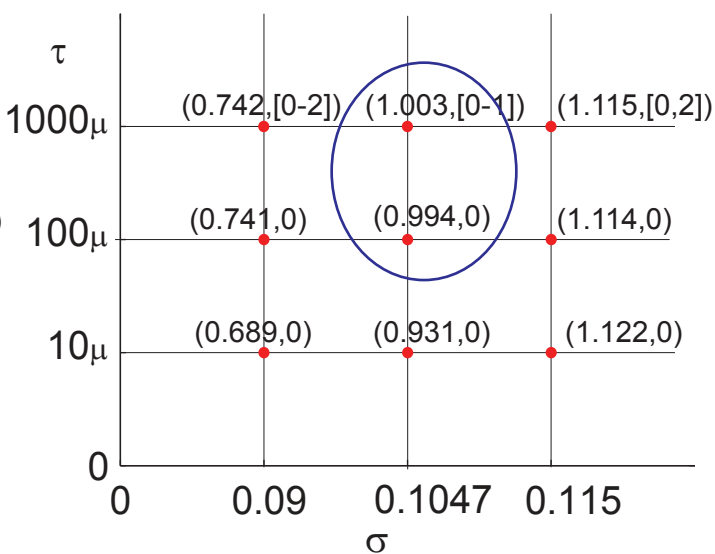

$\mu$  : Period of bio neuron ● (SE, Bifurcation range) ○ regions that fit both criteria
