# Supplementary material for: Slow Noise in the Period of a Biological Oscillator Underlies Gradual Trends and Abrupt Transitions in Phasic Relationships in Hybrid Neural Networks
Source: PubMed Central journal article supplement (PMC4022488; doi:10.1371/journal.pcbi.1003622), 2014-05-15

**A. Network phase (Expt. # 14)**  
 # Bifurcations = 4

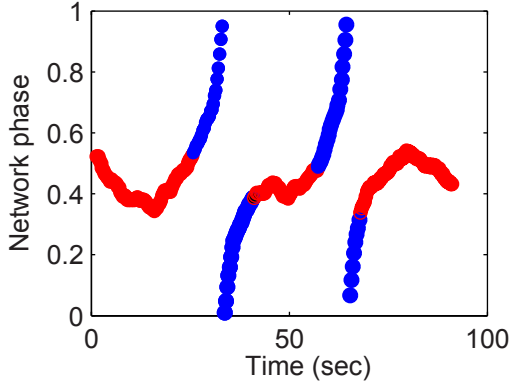

**B. Gaussian period noise**  
 # Bifurcations = 5

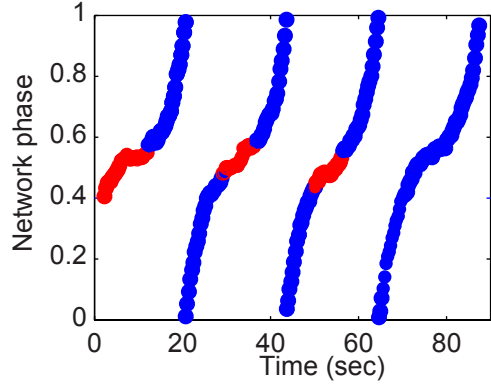

**C. Initial snapshot of tr-ts curves**

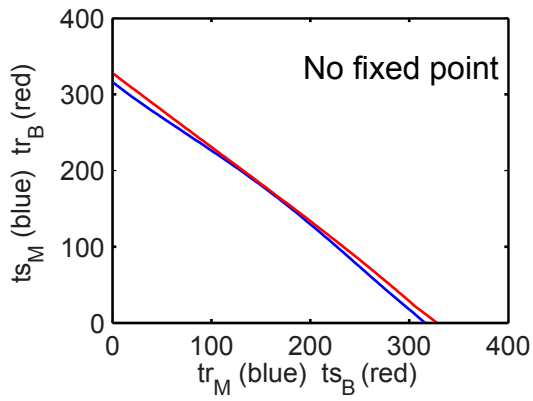

**D. Variation of bio period**

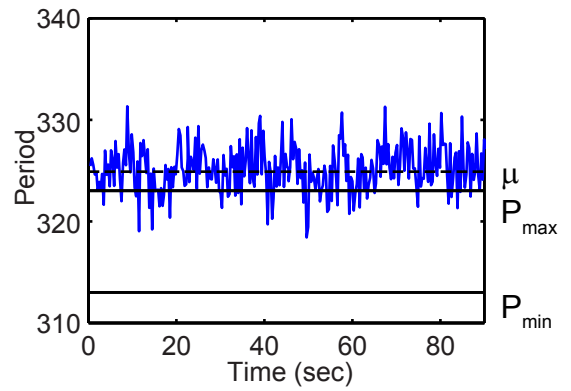

Supplement: pcbi.1003622.s003.pdf [file pcbi.1003622.s003.pdf]
