# Supplementary material for: Slow Noise in the Period of a Biological Oscillator Underlies Gradual Trends and Abrupt Transitions in Phasic Relationships in Hybrid Neural Networks
Source: PubMed Central journal article supplement (PMC4022488; doi:10.1371/journal.pcbi.1003622), 2014-05-15

**A. Hybrid Circuit Experiment 19**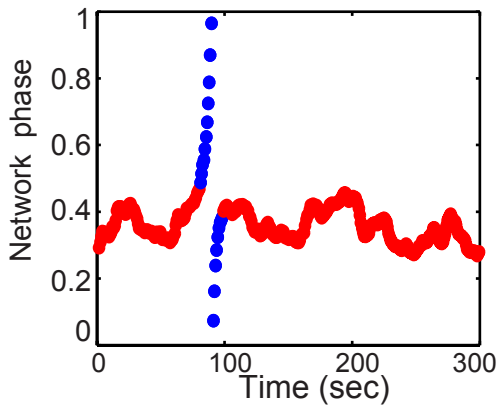**B. No mean reversion**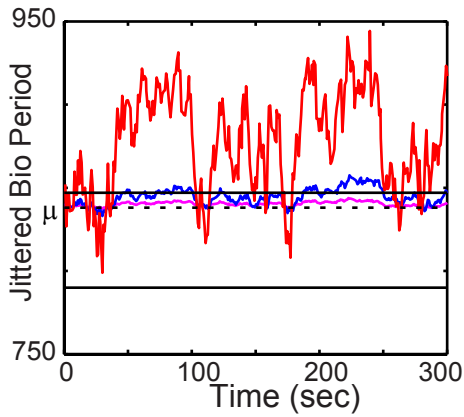**C. Autocorrelation**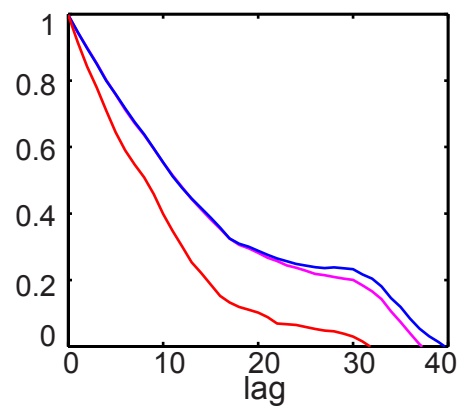**D1**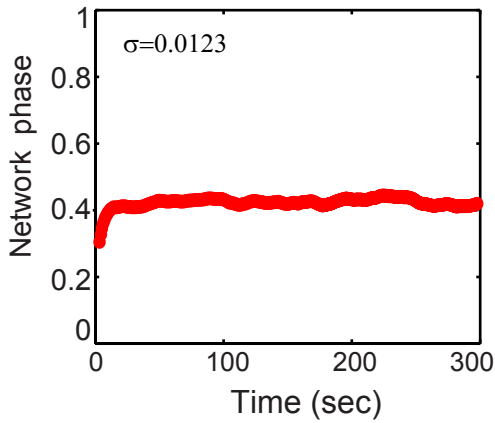**D2**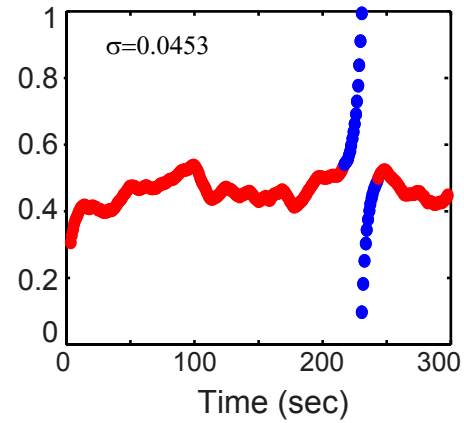**D3**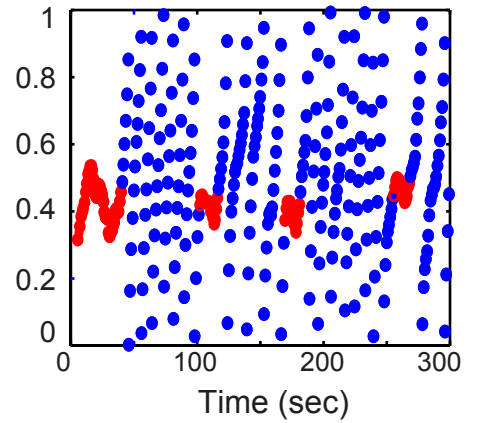**E1**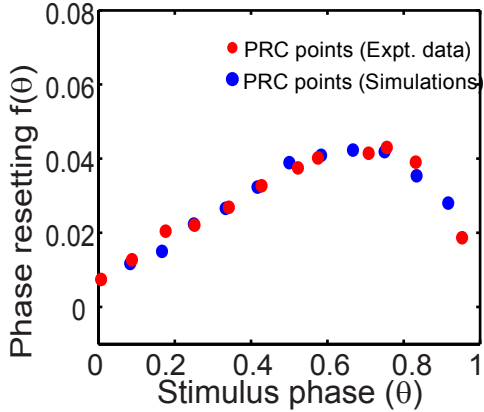**E2**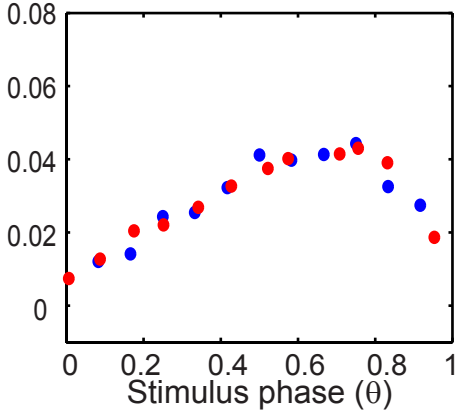**E3**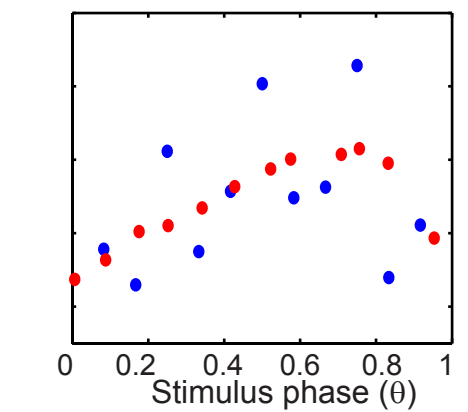

Supplement: pcbi.1003622.s004.pdf [file pcbi.1003622.s004.pdf]
